# Supplementary material for: Using the interfacial barrier effects of p–n junction on electrochemistry for detection of phosphate
Source: Royal Society of Chemistry journal article supplement (doi:10.1039/c9an02579k), 2020-01-01
Supplement: c9an02579k1.pdf [file c9an02579k1.pdf]

## Supplemental Information

Using the interfacial barrier effects of p-n junction on electrochemistry for  
detection of phosphate

Yu Ding<sup>a</sup>, Minggang Zhao<sup>a\*</sup>, Jiatio Yu<sup>a</sup>, Xiaomin Zhang<sup>a</sup>, Zhengming Li<sup>a</sup>, Hui Li<sup>b</sup>

<sup>a</sup>Department of Materials Science and Engineering, Ocean University of China, 266100 Qingdao, PR  
China

<sup>b</sup>Optoelectronic Materials and Technologies Engineering Laboratory of Shandong, Physics Department,  
Qingdao University of Science and Technology, Qingdao 266100, PR China

\* E-mail: [Zhaomg@ouc.edu.cn](mailto:Zhaomg@ouc.edu.cn)

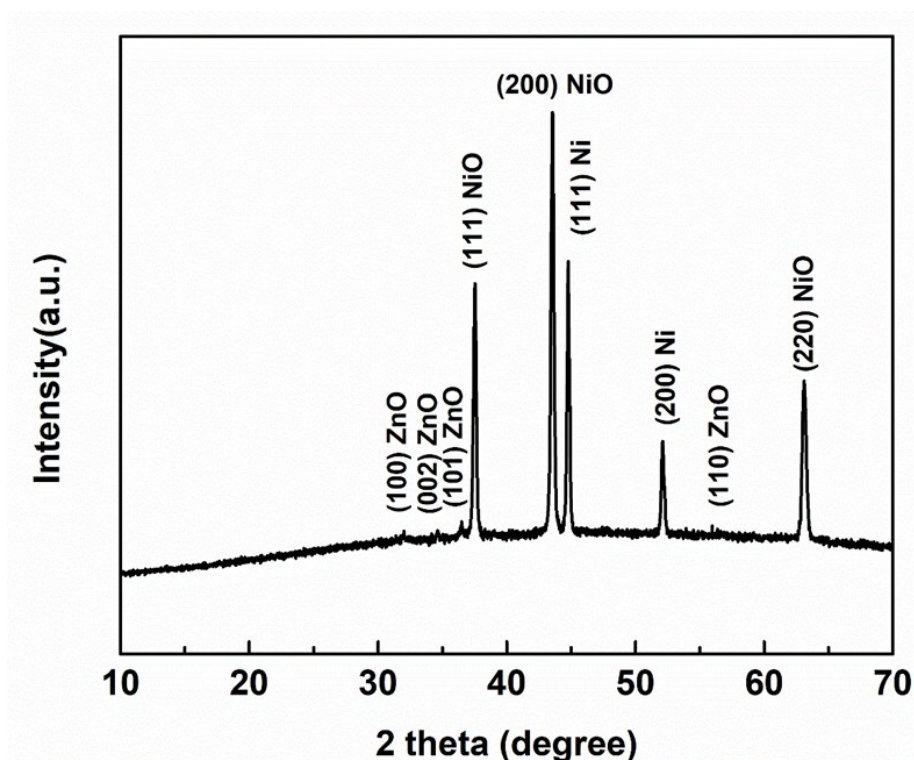

**Fig. S1** XRD patterns of the NiO/ZnO foam.

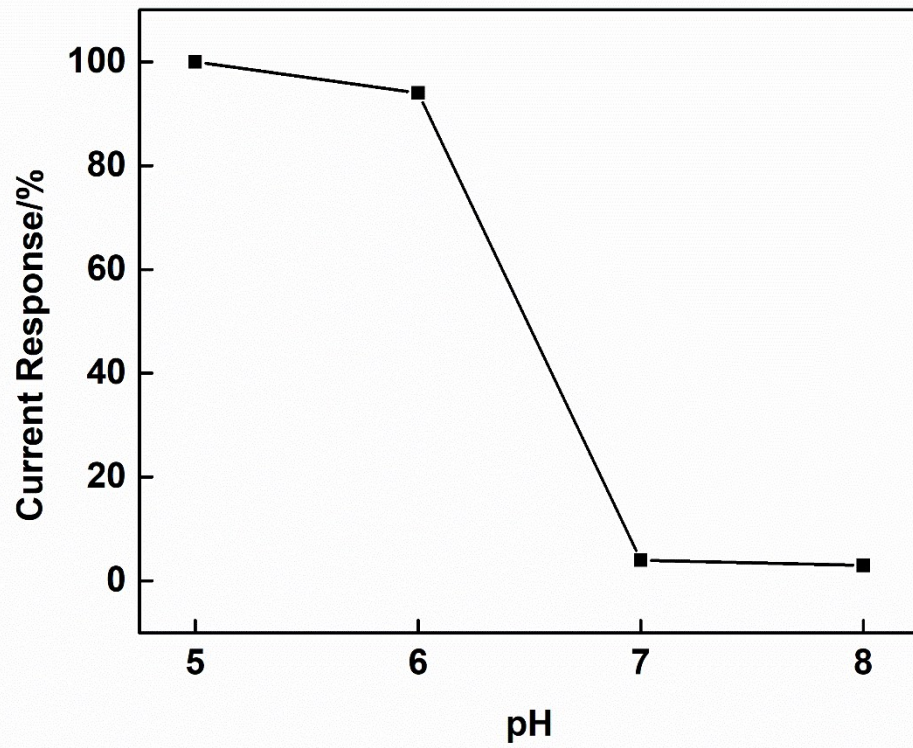

**Fig. S2** Response of electrode material to phosphate in solutions with different pH values.

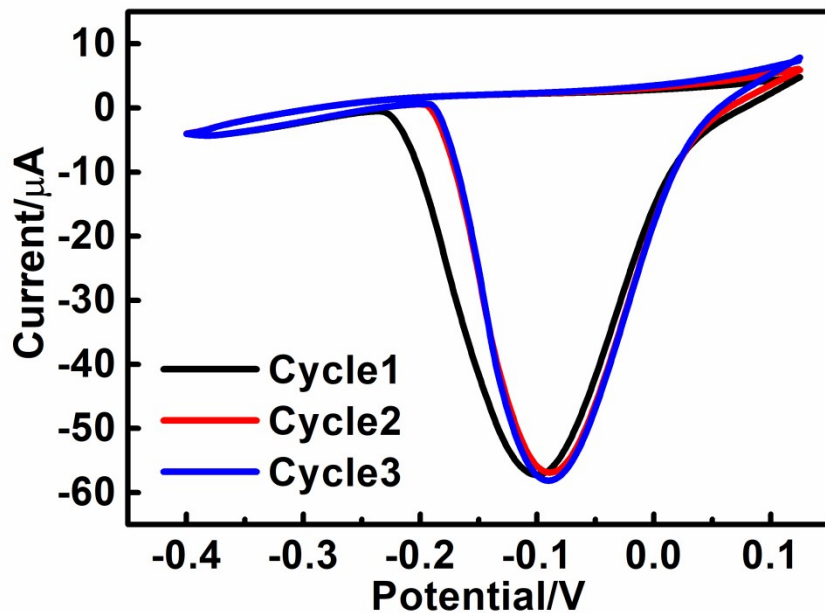

**Fig. S3** The electrochemical response of the NiO/ZnO p-n junction foam to no phosphate addition.

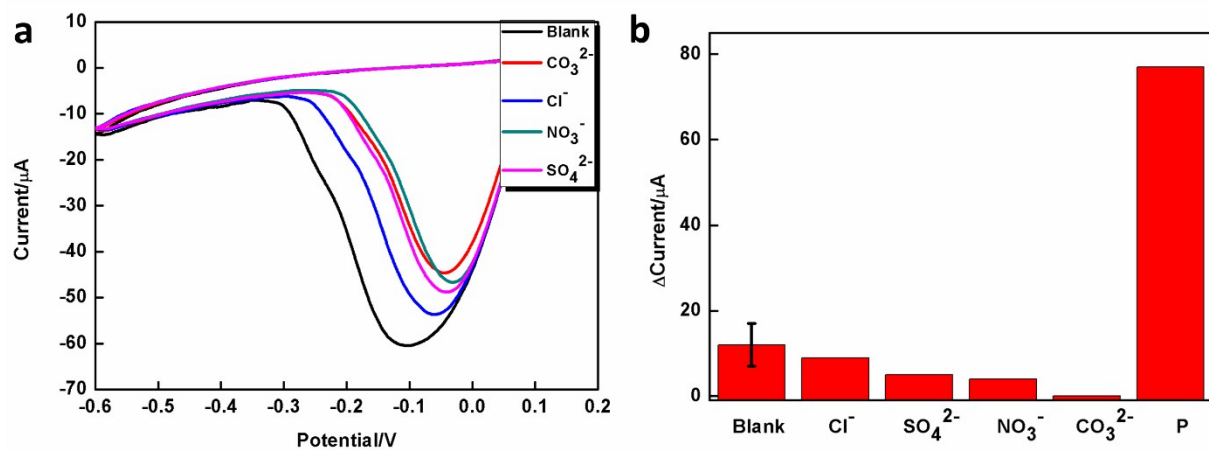

**Fig. S4** (a) The response current of NiO/ZnO when put in different kind of disturb charged ions in same concentration. (b) The selectivity of the NiO/ZnO foam, NaCl, CuSO<sub>4</sub>, Zn(NO<sub>3</sub>)<sub>2</sub> and Li<sub>2</sub>CO<sub>3</sub> were used as the similarities toward phosphate.

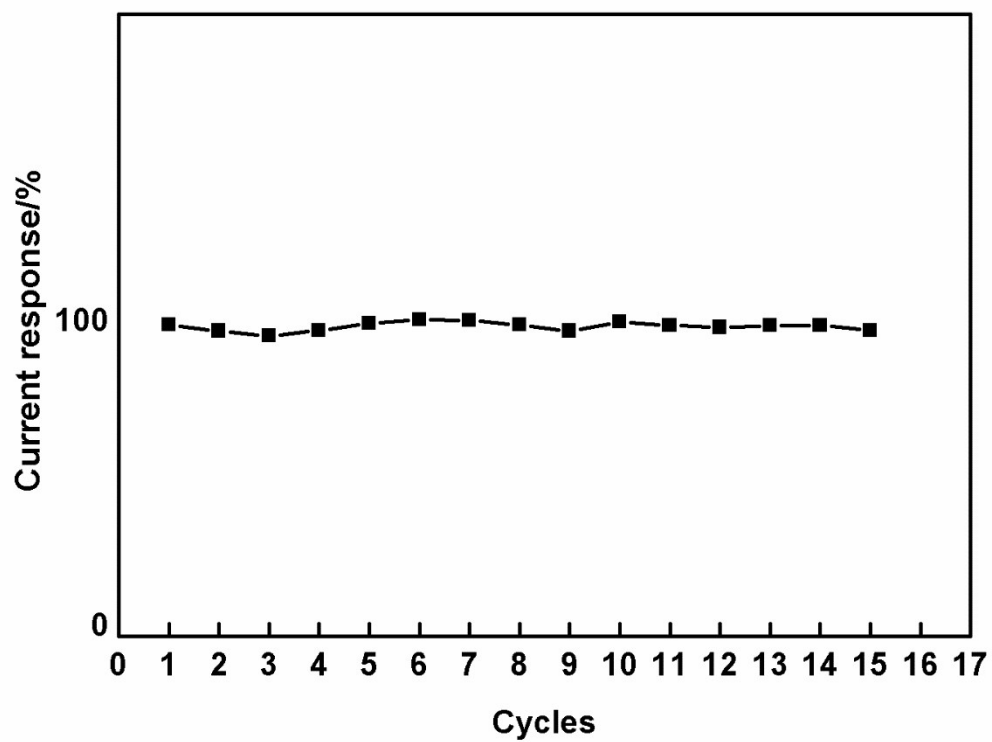

**Fig. S5** The response to phosphate by successively cycling the electrode for 15 repeated cycles.
